# Supplementary material for: Improved effect of a mitochondria-targeted antioxidant on hydrogen peroxide-induced oxidative stress in human retinal pigment epithelium cells
Source: PubMed Central journal article supplement (PMC7819191; doi:10.1186/s40360-020-00471-w), 2021-01-20
Supplement: 40360_2020_471_MOESM1_ESM.pdf [file 40360_2020_471_MOESM1_ESM.pdf]

1 **Improved Effect of a Mitochondria-Targeted Antioxidant on Hydrogen-Peroxide-**  
 2 **Induced Oxidative Stress in Human Retinal Pigment Epithelial Cells**

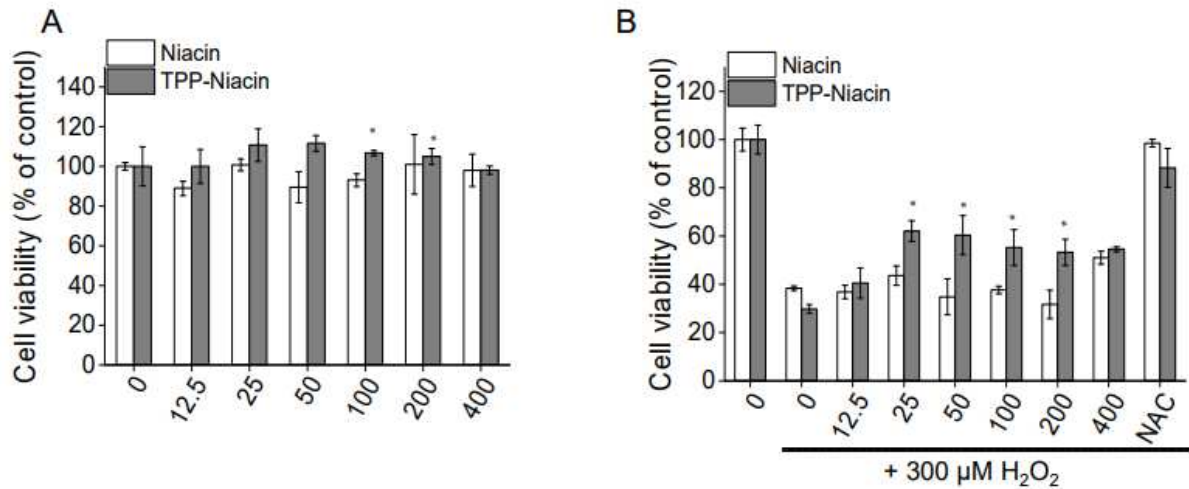

3

4 Supplementary Figure 1. Effects of niacin and TPP-Niacin on cell viabilities of ARPE-19 cells.

5 (A) Different concentrations (range 12.5–400 μM) of niacin and TPP-Niacin were treated in  
 6 ARPE-19 cells for 24 h without H<sub>2</sub>O<sub>2</sub>. (B) Cells were pretreated with niacin or TPP-Niacin for  
 7 2 h and then treated with H<sub>2</sub>O<sub>2</sub> (300 μM) for 24 h, after which cell viabilities were evaluated  
 8 by CCK-8. \*P < 0.05 niacin versus the TPP-Niacin group were considered statistically  
 9 significantly different.

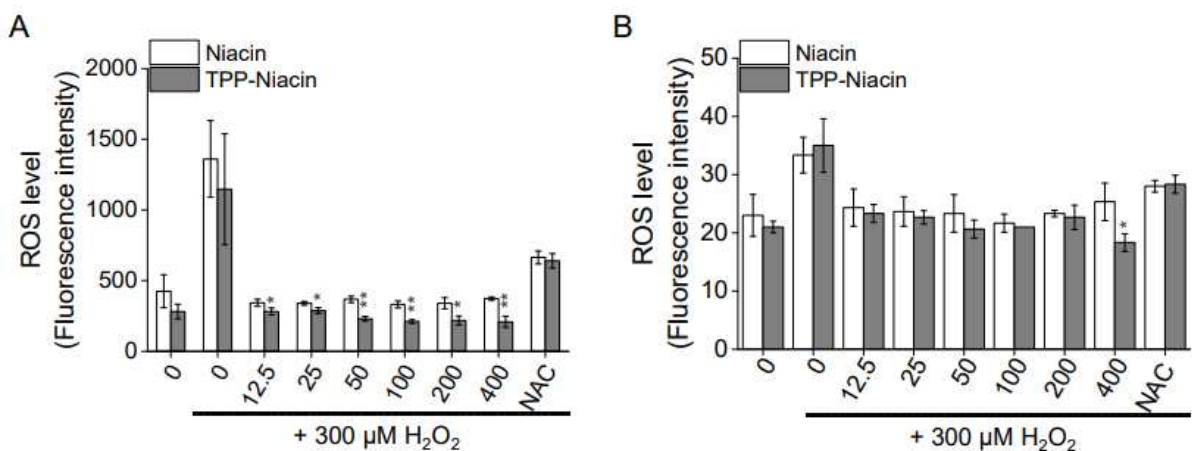

10

11 Supplementary Figure 2. Protective effects of niacin and TPP-Niacin against H<sub>2</sub>O<sub>2</sub>-induced  
 12 ROS production in ARPE-19 cells. Cells were pretreated with various concentrations of niacin  
 13 or TPP-Niacin for 24 h, followed by H<sub>2</sub>O<sub>2</sub> treatment at 300 μM for 24 h. ROS generation was  
 14 determined by H<sub>2</sub>DCF-DA (A) and DHE (B) assays. \*P < 0.05, \*\*P < 0.01 niacin versus the  
 15 TPP-Niacin group were considered statistically significantly different.

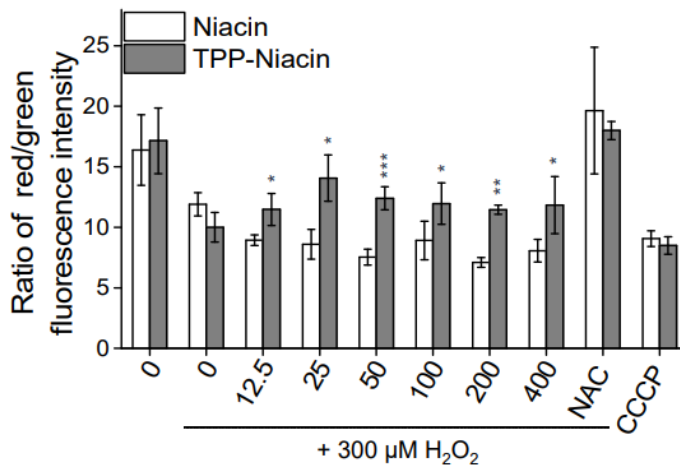

16

17 Supplementary Figure 3. TPP-Niacin improved mitochondrial membrane potential against  
 18 H<sub>2</sub>O<sub>2</sub>-induced mitochondrial membrane potential ( $\Delta\Psi_m$ ) loss at various concentrations in  
 19 ARPE-19 cells, but not niacin. ARPE-19 cells were treated with niacin or TPP-Niacin for 2 h,  
 20 followed by a 300 μM H<sub>2</sub>O<sub>2</sub> treatment for 24 h. MMP was analyzed by JC-10 assay. \*P < 0.05,  
 21 \*\*P < 0.01, \*\*\*P < 0.001 niacin versus the TPP-niacin group were considered statistically  
 22 significantly different.

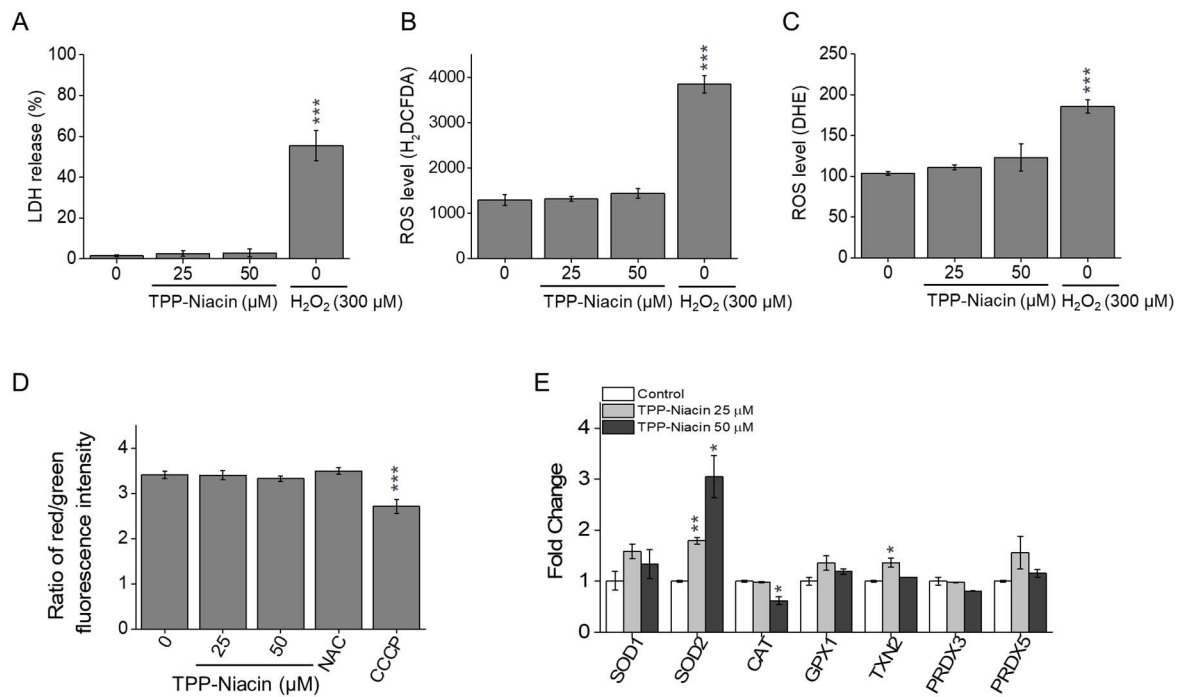

23

24 Supplementary Figure 4. Evaluation of TPP-Niacin on the normal state of ARPE-19 cells. The  
 25 cells were treated with TPP-Niacin at 25 and 50 μM or 0.1% DMSO (vehicle control) for 24 h  
 26 without H<sub>2</sub>O<sub>2</sub> (300 μM) or with H<sub>2</sub>O<sub>2</sub> only treated-group, cytotoxicity was measured by the  
 27 LDH release (A). ROS generation and mitochondrial function were measured by H<sub>2</sub>DCF-DA  
 28 (B) and DHE (C), and MMP (D). Gene expression was analyzed by qPCR of major antioxidant  
 29 related genes (E). All data were analyzed using Student's t-test. \*P < 0.05, \*\*P < 0.01, \*\*\*P <  
 30 0.001 versus control group were considered statistically significant differences.
